# Supplementary material
Source: MDPI journal article supplement (https://www.mdpi.com/2075-163X/13/1/78)
Supplement: s1 [file s1]

| Sample           | Longitude  | Latitude   | Mineral | Crystallization age (Ma) | Age Uncertainty | Metamorphic age (Ma) | Age Uncertainty | Method            | Reference                 |
|------------------|------------|------------|---------|--------------------------|-----------------|----------------------|-----------------|-------------------|---------------------------|
| 1462JS12B        | -62.233500 | -10.878700 | Hbl/Bt  | 0                        | 0               | 1294/1261            | 6/6             | Ar-Ar             | Scandolaro (2006)         |
| 1462JS34         | -62.392000 | -10.542300 | Hbl/Bt  | 0                        | 0               | 1300/1335            | 2/2             | Ar-Ar             | Scandolaro (2006)         |
| 2492-GR-59       | -62.903889 | -9.795611  | Zrn     | 1746                     | 0               | 1699                 | -               | U-Pb SHRIMP       | Santos et al. (2000)      |
| 2492-JL-78       | -62.833889 | -10.160956 | Zrn     | 1743                     | 0               | 1324                 | -               | U-Pb SHRIMP       | Santos et al. (2000)      |
| 42               | -54.882900 | -10.239800 | Zrn     | 1872                     | 12              | -                    | -               | Pb-Pb evaporation | Moura (1998)              |
| 5260-GR-35       | -61.892000 | -11.204000 | Zrn     | 1757                     | 9               | 1626                 | -               | U-Pb SHRIMP       | Santos et al. (2000)      |
| 61-W-3598        | -62.363000 | -9.517000  | Zrn     | 1074                     | 8               | -                    | -               | U-Pb ID-TIMS      | Bettencourt et al. (1999) |
| 61-W-3614        | -62.340000 | -9.574000  | Zrn     | 1080                     | 27              | -                    | -               | U-Pb ID-TIMS      | Bettencourt et al. (1999) |
| 98-JWB-10/A      | -62.437500 | -10.487500 | Zrn     | 1655                     | 11              | -                    | -               | U-Pb ID-TIMS      | Bettencourt et al. (2001) |
| 98-JWB-3/A       | -61.912500 | -11.175000 | Zrn     | 1631                     | 8               | -                    | -               | U-Pb ID-TIMS      | Bettencourt et al. (2001) |
| A1               | -59.325800 | -9.348600  | Zrn     | 1767                     | 2               | -                    | -               | U-Pb ID-TIMS      | Pinho et al. (2003)       |
| A2               | -59.348600 | -9.325800  | Zrn     | 1761                     | 5               | -                    | -               | U-Pb ID-TIMS      | Pinho et al. (2003)       |
| A3               | -59.348600 | -9.288600  | Zrn     | 1774                     | 4               | -                    | -               | U-Pb ID-TIMS      | Pinho et al. (2003)       |
| A4               | -59.374700 | -9.268600  | Zrn     | 1775                     | 13              | -                    | -               | U-Pb ID-TIMS      | Pinho et al. (2003)       |
| A6               | -59.380500 | -9.232200  | Zrn     | 1759                     | 3               | -                    | -               | U-Pb ID-TIMS      | Pinho et al. (2003)       |
| A7               | -59.358300 | -9.390200  | Zrn     | 1764                     | 32              | -                    | -               | U-Pb ID-TIMS      | Pinho et al. (2003)       |
| A8               | -59.294400 | -9.390200  | Zrn     | 1766                     | 5               | -                    | -               | U-Pb ID-TIMS      | Pinho et al. (2003)       |
| AA-22B           | -60.483900 | -8.282860  | Zrn     | 1760                     | 0               | 1530                 | -               | U-Pb SHRIMP       | Oliveira et al. (2014)    |
| AA-32            | -60.493500 | -8.408860  | Zrn     | 1762                     | 7               | -                    | -               | U-Pb SHRIMP       | Oliveira et al. (2014)    |
| AC-08A           | -60.991700 | -8.186990  | Zrn     | 1529                     | 6               | -                    | -               | U-Pb SHRIMP       | Oliveira et al. (2014)    |
| AC-08D           | -60.991700 | -8.186990  | Zrn     | 1503                     | 24              | -                    | -               | U-Pb SHRIMP       | Oliveira et al. (2014)    |
| AC-15B           | -60.991700 | -8.346710  | Zrn     | 1529                     | 21              | -                    | -               | U-Pb SHRIMP       | Oliveira et al. (2014)    |
| AC-23A           | -60.969400 | -8.465720  | Zrn     | 1516                     | 4               | -                    | -               | U-Pb SHRIMP       | Oliveira et al. (2014)    |
| AC-70            | -60.532045 | -6.922097  | Zrn     | 1825                     | 14              | -                    | -               | U-Pb LA-IC        | Reis et al. (2016)        |
| AJ-311           | -55.733200 | -5.416700  | Zrn     | 1786                     | 14              | -                    | -               | U-Pb SHRIMP       | Santos et al. (2004)      |
| AR-3/1           | -63.460000 | -8.805000  | Zrn     | 1544                     | 5               | -                    | -               | U-Pb ID-TIMS      | Payolla et al. (2002)     |
| AR-3-1           | -63.460000 | -8.810000  | Zrn     | 1544                     | 5               | -                    | -               | U-Pb ID-TIMS      | Payolla et al. (2002)     |
| AS-003           | -52.240000 | -10.050000 | Zrn     | 1879                     | 4               | -                    | -               | Pb-Pb evaporation | Alves et al. (2010)       |
| AS-038           | -51.800000 | -10.500000 | Zrn     | 1864                     | 5               | -                    | -               | Pb-Pb evaporation | Alves et al. (2010)       |
| AT-46            | -56.416400 | -6.781900  | Zrn     | 1968                     | 16              | -                    | -               | Pb-Pb evaporation | Vasquez & Klein (2000)    |
| B-01             | -59.020000 | -8.960000  | Zrn     | 0                        | 8               | -                    | -               | U-Pb ID-TIMS      | Pinho et al. (2003)       |
| B-03             | -59.040000 | -8.960000  | Zrn     | 0                        | 190             | -                    | -               | U-Pb ID-TIMS      | Pinho et al. (2003)       |
| B-04             | -59.060000 | -8.960000  | Zrn     | 0                        | 3               | -                    | -               | U-Pb ID-TIMS      | Pinho et al. (2003)       |
| B-599            | -62.807000 | -9.768000  | Zrn     | 1082                     | 5               | -                    | -               | U-Pb ID-TIMS      | Bettencourt et al. (1999) |
| BV-01            | -57.432500 | -6.504500  | Zrn     | 1873                     | 6               | -                    | -               | U-Pb SHRIMP       | Santos et al. (2001)      |
| CA-015           | -53.860000 | -10.140000 | Zrn     | 1968                     | 2               | -                    | -               | Pb-Pb evaporation | Alves et al. (2010)       |
| CA-029           | -53.960000 | -10.570000 | Zrn     | 1775                     | 4               | -                    | -               | Pb-Pb evaporation | Alves et al. (2010)       |
| CA-038           | -53.690000 | -10.100000 | Zrn     | 1987                     | 14              | -                    | -               | U-Pb ICP-MS-LA    | Alves et al. (2010)       |
| CC-002           | -56.050300 | -9.834900  | Zrn     | 1992                     | 7               | -                    | -               | U-Pb SHRIMP       | Souza et al. (2005)       |
| CC-006           | -56.015100 | -9.676500  | Zrn     | 1806                     | 3               | -                    | -               | U-Pb SHRIMP       | Souza et al. (2005)       |
| CC-138           | -62.890000 | -13.150000 | Zrn     | 1786                     | 17              | -                    | -               | U-Pb SHRIMP       | Santos et al. (2001)      |
| CC-158           | -56.654030 | -9.921599  | Zrn     | 1784                     | 17              | -                    | -               | U-Pb SHRIMP       | Souza et al. (2005)       |
| CC-21            | -56.177300 | -9.868100  | Zrn     | 1793                     | 6               | -                    | -               | U-Pb ID-TIMS      | Santos et al. (2000)      |
| CC-233           | -56.732300 | -9.971800  | Zrn     | 1775                     | 10              | -                    | -               | U-Pb SHRIMP       | Souza et al. (2005)       |
| CR-68            | -64.978000 | -9.032000  | Zrn     | 1309                     | 24              | -                    | -               | U-Pb ID-TIMS      | Bettencourt et al. (1999) |
| Dacito Massarar  | -59.539000 | -10.083000 | Zrn     | 1762                     | 6               | -                    | -               | U-Pb SHRIMP       | NÚder et al. (2002)       |
| DG-2             | -58.576900 | -5.868000  | Zrn     | 1892                     | 6               | -                    | -               | U-Pb SHRIMP       | Santos et al. (1997)      |
| EK-089           | -56.740000 | -6.320000  | Zrn     | 1882                     | 4               | -                    | -               | U-Pb ID-TIMS      | Vasques et al. (1999)     |
| EK-38            | -56.842200 | -6.818900  | Zrn     | 1883                     | 2               | -                    | -               | Pb-Pb evaporation | Vasques & Klein (2000)    |
| EK-89            | -56.744700 | -6.317500  | Zrn     | 1882                     | 4               | -                    | -               | Pb-Pb evaporation | Vasques & Klein (2000)    |
| F1011            | -55.017700 | -10.010500 | Zrn     | 1894                     | 6               | -                    | -               | Pb-Pb evaporation | JICA/MMAJ (2000)          |
| F2001            | -56.276969 | -9.517507  | Zrn     | 1786                     | 17              | -                    | -               | Pb-Pb evaporation | JICA/MMAJ (2000)          |
| F2002            | -56.662400 | -9.455500  | Zrn     | 1803                     | 16              | -                    | -               | Pb-Pb evaporation | JICA/MMAJ (2000)          |
| F2003            | -56.596380 | -9.514470  | Zrn     | 1801                     | 8               | -                    | -               | Pb-Pb evaporation | JICA/MMAJ (2000)          |
| F2005            | -57.368000 | -9.410800  | Zrn     | 1819                     | 6               | -                    | -               | Pb-Pb evaporation | JICA/MMAJ (2000)          |
| F2006            | -57.463800 | -9.388000  | Zrn     | 1816                     | 57              | -                    | -               | Pb-Pb evaporation | JICA/MMAJ (2000)          |
| F2007            | -55.229100 | -9.975500  | Zrn     | 1823                     | 35              | -                    | -               | Pb-Pb evaporation | JICA/MMAJ (2000)          |
| F2008            | -55.341900 | -9.987200  | Zrn     | 1848                     | 17              | -                    | -               | Pb-Pb evaporation | JICA/MMAJ (2000)          |
| F2009            | -55.257700 | -9.910300  | Zrn     | 1817                     | 57              | -                    | -               | Pb-Pb evaporation | JICA/MMAJ (2000)          |
| F2010            | -55.175500 | -9.854400  | Zrn     | 1937                     | 100             | -                    | -               | Pb-Pb evaporation | JICA/MMAJ (2000)          |
| F-21             | -57.382200 | -6.150400  | Zrn     | 1974                     | 6               | -                    | -               | U-Pb SHRIMP       | Santos et al. (2001)      |
| FET-12           | -59.144900 | -11.111100 | Zrn     | 1759                     | 0               | -                    | -               | Pb-Pb             | Leite at al. (2006)       |
| FFJ-66           | -58.085800 | -10.842300 | Zrn     | 1776                     | 2               | -                    | -               | Pb-Pb             | Leite at al. (2006)       |
| Fi-05            | -59.120000 | -9.000000  | Zrn     | 0                        | 5               | -                    | -               | U-Pb ID-TIMS      | Pinho et al. (2003)       |
| FS-28a           | -61.494457 | -7.894188  | Zrn     | 1533                     | 4               | -                    | -               | Pb-Pb evaporation | Almeida & Reis (2014)     |
| FS-30a           | -61.478577 | -7.861957  | Zrn     | 1575                     | 13              | -                    | -               | Pb-Pb evaporation | Almeida & Reis (2014)     |
| GH-03A           | -60.515000 | -8.481620  | Zrn     | 1749                     | 10              | -                    | -               | U-Pb SHRIMP       | Oliveira et al. (2014)    |
| GH-11            | -60.485200 | -8.607600  | Zrn     | 1511                     | 8               | -                    | -               | U-Pb SHRIMP       | Oliveira et al. (2014)    |
| GH-12A           | -60.457000 | -8.627590  | Zrn     | 1520                     | 12              | -                    | -               | U-Pb SHRIMP       | Oliveira et al. (2014)    |
| GM-008           | -55.042860 | -10.882296 | Zrn     | 1781                     | 8               | -                    | -               | U-Pb ID-TIMS      | Souza et al. (2005)       |
| GM-008           | -53.970000 | -10.520000 | Zrn     | 1792                     | 8               | -                    | -               | U-Pb ICP-MS-LA    | Alves et al. (2010)       |
| GM-010           | -55.127900 | -10.722300 | Zrn     | 1757                     | 16              | -                    | -               | U-Pb SHRIMP       | Souza et al. (2005)       |
| GM-033           | -58.650000 | -11.410000 | Zrn     | 1580                     | 35              | -                    | -               | U-Pb ID-TIMS      | Martins & Abdallah (2007) |
| GM-080           | -55.042800 | -10.882200 | Zrn     | 1781                     | 8               | -                    | -               | U-Pb SHRIMP       | Souza et al. (2005)       |
| GR/ USP-RO-10    | -60.545528 | -13.137083 | Zrn     | 1353                     | 4               | -                    | -               | U-Pb ID-TIMS      | Rizzotto et al. (2002)    |
| GR/USP-RO-11     | -60.538000 | -13.135085 | Zrn     | 1352                     | 4               | -                    | -               | U-Pb ID-TIMS      | Rizzotto et al. (2002)    |
| GR-035           | -61.897222 | -11.205527 | Zrn     | 1758                     | 7               | 1649                 | 5               | U-Pb SHRIMP       | Santos et al. (2008)      |
| GR-048           | -64.989000 | -9.038000  | Zrn     | 1570                     | 17              | -                    | -               | U-Pb SHRIMP       | Bettencourt et al. (1999) |
| GR-05            | -62.039000 | -11.993000 | Zrn     | 1110                     | 10              | -                    | -               | U-Pb ID-TIMS      | Rizzotto et al. (1999)    |
| GR-059           | -62.903889 | -9.795611  | Zrn     | 1753                     | 9               | 1677                 | 6               | U-Pb SHRIMP       | Santos et al. (2008)      |
| GR-06            | -64.018000 | -10.505000 | Zrn     | 1062                     | 3               | -                    | -               | U-Pb SHRIMP       | Rizzotto et al. (1999)    |
| GR-10A           | -62.142000 | -11.925000 | Zrn     | 1113                     | 56              | -                    | -               | U-Pb ID-TIMS      | Rizzotto et al. (1999)    |
| GR-20            | -62.186000 | -11.672000 | Zrn     | 1110                     | 8               | -                    | -               | U-Pb ID-TIMS      | Rizzotto et al. (1999)    |
| GR-23            | -62.010000 | -11.874000 | Zrn     | 1005                     | 41              | -                    | -               | U-Pb ID-TIMS      | Rizzotto et al. (1999)    |
| GR-333           | -62.069333 | -10.779444 | Zrn     | 1515                     | 8               | 1348                 | 4               | U-Pb SHRIMP       | Santos et al. (2008)      |
| GR-66            | 62.039600  | -11.871200 | Zrn     | 1215                     | 20              | -                    | -               | U-Pb SHRIMP       | Rizzotto et al. (1999)    |
| Granito ParaibÔc | -59.540000 | -10.077000 | Zrn     | 1755                     | 5               | -                    | -               | U-Pb SHRIMP       | Néder et al. (2002)       |
| JD-017B          | -56.397100 | -10.206200 | Zrn     | 1770                     | 9               | -                    | -               | U-Pb SHRIMP       | Souza et al. (2005)       |
| JH-29            | -57.630500 | -5.146900  | Zrn     | 2020                     | 12              | -                    | -               | U-Pb SHRIMP       | Santos et al. (2001)      |
| JL-06            | -62.973472 | -10.078778 | Zrn     | 0                        | 0               | 1339                 | 3               | U-Pb SHRIMP       | Santos et al. (2008)      |
| JL-078           | -62.833889 | -10.160944 | Zrn     | 1738                     | 6               | 1334                 | 7               | U-Pb SHRIMP       | Santos et al. (2008)      |
| JO-03            | -59.478900 | -16.341400 | Zrn     | 1818                     | 13              | 1339                 | 4               | U-Pb SHRIMP       | Santos et al. (2008)      |
| JO-05            | -59.520732 | -16.495433 | Zrn     | 1334                     | 0               | 1334                 | -               | U-Pb SHRIMP       | Santos et al. (2008)      |
| JO-06            | -59.733488 | -16.314850 | Zrn     | 1349                     | 6               | 1336                 | 3               | U-Pb SHRIMP       | Santos et al. (2008)      |
| JO-08            | -61.928064 | -15.964474 | Zrn     | 0                        | 0               | 1118                 | 15              | U-Pb SHRIMP       | Santos et al. (2008)      |
| JO-09            | -61.969680 | -16.004839 | Zrn     | 1330                     | 0               | -                    | -               | U-Pb SHRIMP       | Santos et al. (2008)      |
| JO-099           | -57.385100 | -6.155100  | Zrn+Ttn | 1893                     | 3               | -                    | -               | U-Pb TIMS         | Santos et al. (2004)      |
| JO-10            | -62.210490 | -16.215077 | Zrn     | 1275                     | 7               | -                    | -               | U-Pb SHRIMP       | Santos et al. (2008)      |
| JO-101b          | -57.626900 | -6.144200  | Zrn     | 1898                     | 7               | -                    | -               | U-Pb SHRIMP       | Santos et al. (1997)      |
| JO-102           | -57.531400 | -6.234200  | Zrn+Ttn | 1897                     | 2               | -                    | -               | U-Pb TIMS         | Santos et al. (2004)      |
| JO-107           | -55.390000 | -6.209900  | Zrn     | 1968                     | 7               | -                    | -               | U-Pb SHRIMP       | Santos et al. (2004)      |
| JO-12            | -62.330851 | -16.274368 | Zrn     | 1641                     | 4               | -                    | -               | U-Pb SHRIMP       | Santos et al. (2008)      |
| JO-13            | -62.431190 | -16.578660 | Zrn     | 1110                     | 0               | -                    | -               | U-Pb SHRIMP       | Santos et al. (2008)      |

|              |            |            |            |      |    |                |       |                          |                           |
|--------------|------------|------------|------------|------|----|----------------|-------|--------------------------|---------------------------|
| JO-14        | -62.507128 | -16.615514 | Zrn        | 1429 | 4  | -              | -     | U-Pb SHRIMP              | Santos et al. (2008)      |
| JO-154       | -56.441300 | -4.783600  | Zrn        | 1997 | 5  | -              | -     | U-Pb SHRIMP              | Santos et al. (2004)      |
| JO-16        | -62.505284 | -16.381691 | Zrn        | 1330 | 0  | -              | -     | U-Pb SHRIMP              | Santos et al. (2008)      |
| JO-170       | -56.289600 | -4.553300  | Zrn        | 1896 | 5  | -              | -     | U-Pb SHRIMP              | Santos et al. (2004)      |
| JO-172       | -56.289600 | -4.553300  | Zrn        | 1907 | 9  | -              | -     | U-Pb SHRIMP              | Santos et al. (2004)      |
| JO-173       | -56.594700 | -6.819700  | Zrn        | 2015 | 9  | -              | -     | U-Pb SHRIMP              | Santos et al. (2001)      |
| JO-175       | -56.594700 | -6.819700  | Zrn        | 1966 | 5  | -              | -     | U-Pb SHRIMP              | Santos et al. (2001)      |
| JO-18        | -60.652397 | -16.265587 | Zrn        | 1319 | 6  | -              | -     | U-Pb SHRIMP              | Santos et al. (2008)      |
| JO-180       | -57.179100 | -6.819800  | Zrn        | 1963 | 6  | -              | -     | U-Pb SHRIMP              | Santos et al. (2001)      |
| JO-184       | -56.979900 | -5.030000  | Ttn        | 1879 | 8  | -              | -     | U-Pb SHRIMP              | Santos et al. (2001)      |
| JO-190       | -57.384100 | -6.148600  | Zrn        | 2012 | 8  | -              | -     | U-Pb SHRIMP              | Santos et al. (2001)      |
| JO-199       | -56.648800 | -7.545000  | Zrn        | 1874 | 7  | -              | -     | U-Pb SHRIMP              | Santos et al. (1997)      |
| JO-3         | -59.478924 | -16.341479 | Zrn        | 1818 | 13 | 1339           | 4     | U-Pb SHRIMP              | Santos et al. (2008)      |
| JO-51        | -57.168000 | -7.226000  | Zrn        | 2006 | 3  | -              | -     | U-Pb TIMS                | Santos et al. (1997)      |
| JO-54        | -58.059600 | -5.707300  | Zrn        | 1879 | 3  | -              | -     | U-Pb SHRIMP              | Santos et al. (1997)      |
| JO-69        | -57.019900 | -5.781100  | Zrn + Bdy  | 1880 | 2  | -              | -     | U-Pb SHRIMP              | Santos et al. (2004)      |
| JS-39        | -63.521555 | -10.506500 | Zrn        | 1339 | 7  | -              | -     | U-Pb SHRIMP              | Santos et al. (2008)      |
| JVR-110      | -59.127530 | -9.415250  | Zrn        | 0    | 0  | 1669           | 6     | U-Pb ID-TIMS             | Lacerda Filho (2004)      |
| LB-02c2      | -60.675430 | -7.538570  | Bdy        | 1576 | 4  | -              | -     | U-Pb SHRIMP              | Almeida & Reis (2014)     |
| LB-19d       | -60.417950 | -7.758210  | Bdy        | 1540 | 0  | -              | -     | U-Pb SHRIMP              | Almeida & Reis (2014)     |
| LB-31a       | -60.253740 | -7.865310  | Zrn        | 1757 | 5  | -              | -     | U-Pb SHRIMP              | Almeida & Reis (2014)     |
| LB-61        | -60.409490 | -7.719950  | Zrn        | 1805 | 8  | -              | -     | U-Pb SHRIMP              | Almeida & Reis (2014)     |
| LB-68        | -60.205780 | -7.725060  | Zrn        | 1790 | 18 | -              | -     | U-Pb LA-IC               | Almeida & Reis (2014)     |
| LB-73b       | -60.174330 | -7.722400  | Zrn        | 1754 | 6  | -              | -     | U-Pb LA-IC               | Almeida & Reis (2014)     |
| MA-001       | -57.358200 | -9.572500  | Zrn        | 1784 | 32 | -              | -     | U-Pb ICP-MS-LA           | Silva & Abram (2008)      |
| MA-001       | -57.358200 | -9.572500  | Ms         | 0    | 0  | 1330           | 6     | Ar-Ar                    | Silva & Abram (2008)      |
| MA-004       | -57.050540 | -9.346201  | Zrn        | 1785 | 6  | -              | -     | U-Pb ICP-MS-LA           | Silva & Abram (2008)      |
| MA-009       | -55.680200 | -9.895600  | Zrn        | 1889 | 6  | -              | -     | U-Pb ICP-MS-LA           | Silva & Abram (2008)      |
| MA-015       | -55.814300 | -10.188600 | Zrn        | 1817 | 12 | -              | -     | U-Pb ICP-MS-LA           | Silva & Abram (2008)      |
| MA-016 (1)   | -55.650000 | -10.672200 | Zrn        | 1794 | 20 | -              | -     | U-Pb ICP-MS-LA           | Silva & Abram (2008)      |
| MA-018       | -55.091300 | -10.572000 | Zrn        | 1781 | 17 | -              | -     | U-Pb ICP-MS-LA           | Silva & Abram (2008)      |
| MA-035       | -57.399000 | -6.856600  | Zrn        | 1870 | 4  | -              | -     | U-Pb SHRIMP              | Santos et al. (2001)      |
| MA-04        | -60.539190 | -7.798090  | Zrn        | 1535 | 2  | -              | -     | Pb-Pb evaporation        | Almeida & Reis (2014)     |
| MA-10C       | -55.582000 | -9.808000  | Ms         | 0    | 0  | 1786           | 14    | Ar-Ar                    | Silva & Abram (2008)      |
| MA-12A       | -55.939010 | -9.821900  | Zrn        | 1808 | 14 | -              | -     | U-Pb ICP-MS-LA           | Silva & Abram (2008)      |
| MA-16A       | -55.650000 | -10.672200 | Ms         | 0    | 0  | 1392           | 7     | Ar-Ar                    | Silva & Abram (2008)      |
| MA-16B       | -55.650000 | -10.672200 | Bt         | 0    | 0  | 1454           | 7     | Ar-Ar                    | Silva & Abram (2008)      |
| MA-16G       | -55.650000 | -10.672200 | Ms         | 0    | 0  | 1394           | 7     | Ar-Ar                    | Silva & Abram (2008)      |
| MA-20F       | -55.078400 | -10.209200 | Bt         | 0    | 0  | 1511           | 8     | Ar-Ar                    | Silva & Abram (2008)      |
| MA-44        | -57.464000 | -6.896000  | Zrn        | 2005 | 7  | -              | -     | U-Pb SHRIMP              | Santos et al. (2001)      |
| MC-120       | -58.910000 | -9.190000  | Zrn        | 1769 | 17 | -              | -     | U-Pb ICP-MS-LA           | Ribeiro & Duarte (2010)   |
| MC-27A       | -59.130000 | -9.420000  | Zrn        | 1783 | 14 | -              | -     | U-Pb ICP-MS-LA           | Ribeiro & Duarte (2010)   |
| MC-27B       | -59.130000 | -9.420000  | Zrn        | 0    | 0  | 1439           | 39    | U-Pb ICP-MS-LA           | Ribeiro & Duarte (2010)   |
| MC-31B       | -58.970000 | -9.590000  | Zrn        | 1773 | 15 | -              | -     | U-Pb ICP-MS-LA           | Ribeiro & Duarte (2010)   |
| MG-JB-1-94   | -63.440000 | -9.949000  | Zrn        | 991  | 4  | -              | -     | U-Pb ID-TIMS             | Bettencourt et al. (1999) |
| MM-036       | -58.249000 | -5.245500  | Zrn        | 1870 | 8  | -              | -     | U-Pb SHRIMP              | Santos et al. (2001)      |
| MMRBP-168-3R | -64.065000 | -8.899000  | Zrn        | 1387 | 16 | -              | -     | U-Pb ID-TIMS             | Bettencourt et al. (1999) |
| MMRBP-3/1-6R | -63.998000 | -8.849000  | Zrn        | 1406 | 32 | -              | -     | U-Pb ID-TIMS             | Bettencourt et al. (1999) |
| MP-52        | -57.636600 | -6.013000  | Zrn        | 1872 | 4  | -              | -     | U-Pb SHRIMP              | Santos et al. (2001)      |
| MQ-102       | -56.889700 | -5.765000  | Zrn        | 2033 | 7  | -              | -     | U-Pb SHRIMP              | Santos et al. (2001)      |
| MQ-33        | -59.560000 | -10.110000 | Zrn        | 1537 | 7  | -              | -     | U-Pb SHRIMP              | Rizzotto et al. (2002)    |
| MQ-96        | -60.797000 | -11.476000 | Zrn        | 1740 | 8  | -              | -     | U-Pb SHRIMP              | Santos et al. (2000)      |
| MS-6030      | -62.123000 | -9.648000  | Zrn        | 1570 | 17 | -              | -     | U-Pb ID-TIMS             | Payolla et al. (2002)     |
| MV-30        | -56.170000 | -7.683000  | Zrn        | 1997 | 3  | -              | -     | Pb-Pb evaporation        | Vasquez & Klein (2000)    |
| O-2678       | -62.912000 | -9.366000  | Zrn        | 998  | 5  | -              | -     | U-Pb ID-TIMS             | Bettencourt et al. (1999) |
| P18          | -59.140500 | -9.387200  | Zrn        | 1705 | 38 | -              | -     | U-Pb ID-TIMS             | Pinho et al. (2003)       |
| P-18         | -59.140550 | -9.387220  | Zrn        | 0    | 0  | 1669           | 7     | Pb-Pb                    | Pinho et al. (2003)       |
| P20          | -59.125800 | -9.378000  | Zrn        | 1772 | 66 | -              | -     | U-Pb ID-TIMS             | Pinho et al. (2003)       |
| P21          | -59.125800 | -9.367500  | Zrn        | 1765 | 4  | -              | -     | U-Pb ID-TIMS             | Pinho et al. (2003)       |
| P25          | -59.115500 | -9.354100  | Zrn        | 1763 | 6  | -              | -     | U-Pb ID-TIMS             | Pinho et al. (2003)       |
| P29          | -59.119100 | -9.153800  | Zrn        | 1803 | 3  | -              | -     | U-Pb ID-TIMS             | Pinho et al. (2003)       |
| PGJS01       | -62.895900 | -9.781500  | Hbl        | 0    | 0  | 1292           | 4     | Ar-Ar                    | Scandolara (2006)         |
| PG-JS-01     | -62.895917 | -9.781500  | Zrn        | 1535 | 27 | 1332           | 11    | U-Pb SHRIMP              | Silva et al. (2002)       |
| PGJS02       | -63.083300 | -9.918400  | Hbl        | 0    | 0  | 1105           | 4     | Ar-Ar                    | Scandolara (2006)         |
| PGJS05       | -62.288500 | -10.669300 | Bt         | 0    | 0  | 1122           | 2     | Ar-Ar                    | Scandolara (2006)         |
| PGJS102      | -61.948400 | -11.995500 | Mnz        | 0    | 0  | 1339           | 5     | U-Pb ID-TIMS             | Scandolara (2006)         |
| PGJS11       | -62.837500 | -10.858300 | Hbl/Bt     | 0    | 0  | 1196/1298      | 2/4   | Ar-Ar                    | Scandolara (2006)         |
| PGJS147A     | -63.148600 | -10.363300 | Ttn        | 0    | 0  | 1330           | 7     | U-Pb ID-TIMS             | Scandolara (2006)         |
| PGJS16       | -62.941800 | -9.796900  | Hbl/Hbl    | 0    | 0  | 1195/1206      | 2/2   | Ar-Ar                    | Scandolara (2006)         |
| PG-JS-16     | -62.941833 | -9.796944  | Zrn        | 1555 | 19 | 1321           | 27    | U-Pb SHRIMP              | Silva et al. (2002)       |
| PG-JS-19     | -60.995750 | -11.505139 | Zrn        | 1545 | 8  | -              | -     | U-Pb SHRIMP              | Silva et al. (2002)       |
| PGJS258      | -62.331400 | -10.215700 | Mnz        | 0    | 0  | 1334           | 2     | U-Pb ID-TIMS             | Scandolara (2006)         |
| PG-JS-26     | -64.922389 | -9.613000  | Zrn        | 1728 | 15 | -              | -     | U-Pb SHRIMP              | Silva et al. (2002)       |
| PG-JS-32     | -61.412917 | -11.462417 | Zrn        | 1522 | 10 | 1349           | 5     | U-Pb SHRIMP              | Silva et al. (2002)       |
| PGJS38A      | -62.899400 | -10.201100 | Ttn/Hbl/Bt | 0    | 0  | 1220/1221/1267 | 2/4/4 | U-Pb ID-TIMS/Ar-Ar/Ar-Ar | Scandolara (2006)         |
| PS-019       | -60.390000 | -9.360000  | Zrn        | 1730 | 9  | -              | -     | U-Pb ICP-MS-LA           | Ribeiro & Duarte (2010)   |
| PS-021       | -60.030000 | -9.360000  | Zrn        | 1772 | 12 | -              | -     | U-Pb ICP-MS-LA           | Ribeiro & Duarte (2010)   |
| PS-029       | -60.070000 | -9.550000  | Zrn        | 1764 | 13 | -              | -     | U-Pb ICP-MS-LA           | Ribeiro & Duarte (2010)   |
| PS-042       | -57.785700 | -9.797600  | Zrn        | 1785 | 8  | -              | -     | U-Pb SHRIMP              | Souza et al. (2005)       |
| PS-064       | -60.060000 | -9.870000  | Zrn        | 1774 | 28 | -              | -     | U-Pb ICP-MS-LA           | Ribeiro & Duarte (2010)   |
| PS-170       | -60.510000 | -9.010000  | Zrn        | 1505 | 10 | -              | -     | U-Pb ICP-MS-LA           | Ribeiro & Duarte (2010)   |
| PS-170       | -60.510000 | -9.010000  | Zrn        | 1516 | 11 | -              | -     | U-Pb ICP-MS-LA           | Ribeiro & Duarte (2010)   |
| PS-171       | -58.213700 | -9.824900  | Zrn        | 1774 | 28 | 1654           | 42    | U-Pb SHRIMP              | Souza et al. (2005)       |
| PS-306       | -61.320000 | -9.450000  | Zrn        | 1787 | 14 | -              | -     | U-Pb ICP-MS-LA           | Ribeiro & Duarte (2010)   |
| PT-12        | -62.291000 | -10.620000 | Zrn        | 1657 | 16 | -              | -     | U-Pb TIMS                | Santos et al. (2000)      |
| RB-01        | -60.136334 | -6.700845  | Zrn        | 1766 | 6  | -              | -     | U-Pb LA-IC               | Brito et al. (2010)       |
| RB-012       | -60.136000 | -6.696000  | Zrn        | 1766 | 6  | -              | -     | U-Pb ICP-MS-LA           | Brito et al. (2008)       |
| RB-012       | -56.140000 | -6.710000  | Zrn        | 1893 | 2  | -              | -     | U-Pb ID-TIMS             | Vasques et al. (1999)     |
| RB-053       | -55.760000 | -5.670000  | Zrn        | 1888 | 2  | -              | -     | U-Pb ID-TIMS             | Vasques et al. (1999)     |
| RB-12        | -56.141100 | -5.111600  | Zrn        | 1893 | 3  | -              | -     | Pb-Pb evaporation        | Vasques & Klein (2000)    |
| RB-16a       | -60.989400 | -7.921050  | Zrn        | 1756 | 10 | -              | -     | U-Pb LA-IC               | Almeida & Reis (2014)     |
| RJ-79        | -65.025000 | -9.521000  | Zrn        | 1751 | 16 | -              | -     | U-Pb SHRIMP              | Santos et al. (2001)      |
| RO-14a       | -60.555000 | -13.155000 | Zrn        | 1307 | 2  | -              | -     | U-Pb SHRIMP              | Rizzotto et al. (2002)    |
| RO-18        | -60.640000 | -13.135000 | Zrn        | 1313 | 4  | -              | -     | U-Pb SHRIMP              | Rizzotto et al. (2002)    |
| RO-19        | -60.655000 | -13.135000 | Zrn        | 1319 | 10 | -              | -     | U-Pb SHRIMP              | Rizzotto et al. (2002)    |
| RON-121      | -62.398000 | -10.532000 | Zrn        | 1429 | 9  | -              | -     | U-Pb ID-TIMS             | Rizzotto et al. (2002)    |
| RON-122      | -62.345000 | -10.602000 | Zrn        | 1215 | 7  | -              | -     | U-Pb ID-TIMS             | Rizzotto et al. (2002)    |
| RON-134      | -61.780000 | -11.916000 | Zrn        | 1090 | 6  | -              | -     | U-Pb ID-TIMS             | Rizzotto et al. (2002)    |
| RON-316      | -61.851000 | -11.822000 | Zrn        | 1020 | 15 | -              | -     | U-Pb ID-TIMS             | Rizzotto et al. (2002)    |
| RON-319      | -61.853000 | -11.958000 | Zrn        | 993  | 12 | -              | -     | U-Pb ID-TIMS             | Rizzotto et al. (2002)    |
| RON-326      | -62.197000 | -11.680000 | Zrn        | 1082 | 6  | -              | -     | U-Pb ID-TIMS             | Rizzotto et al. (2002)    |
| S-1579       | -62.461000 | -9.667000  | Zrn        | 1081 | 50 | -              | -     | U-Pb ID-TIMS             | Bettencourt et al. (1999) |
| SC-90-6      | -63.006000 | -9.649000  | Zrn        | 995  | 73 | -              | -     | U-Pb ID-TIMS             | Bettencourt et al. (1999) |
| SCL-1        | -62.501000 | -9.583000  | Zrn        | 1074 | 0  | -              | -     | U-Pb ID-TIMS             | Bettencourt et al. (1999) |

|          |            |            |     |      |    |      |   |                |                           |
|----------|------------|------------|-----|------|----|------|---|----------------|---------------------------|
| SD-045   | -57.139900 | -5.879900  | Bdy | 1778 | 9  | -    | - | U-Pb SHRIMP    | Santos et al. (2002)      |
| SK-055   | -57.510000 | -11.260000 | Zrn | 1763 | 37 | -    | - | U-Pb ICP-MS-LA | Knust 2010                |
| SK-071   | -58.480000 | -11.250000 | Zrn | 1552 | 7  | -    | - | U-Pb ICP-MS-LA | Knust 2010                |
| SK-115   | -51.440000 | -10.480000 | Zrn | 1840 | 8  | -    | - | U-Pb ICP-MS-LA | Alves et al. (2010)       |
| SK-159   | -51.100000 | -10.100000 | Zrn | 2828 | 21 | -    | - | U-Pb ICP-MS-LA | Alves et al. (2010)       |
| SP-GR-21 | -61.611000 | -10.814000 | Zrn | 1573 | 15 | -    | - | U-Pb ID-TIMS   | Bettencourt et al. (1999) |
| SP-GR-39 | -61.626000 | -11.049000 | Zrn | 1566 | 3  | -    | - | U-Pb ID-TIMS   | Bettencourt et al. (1999) |
| SP-GR-48 | -61.422000 | -10.748000 | Zrn | 1566 | 5  | -    | - | U-Pb ID-TIMS   | Bettencourt et al. (1999) |
| SP-GR-53 | -61.586000 | -10.781000 | Zrn | 1554 | 47 | -    | - | U-Pb ID-TIMS   | Bettencourt et al. (1999) |
| SP-GR-76 | -61.474000 | -10.750000 | Zrn | 1606 | 24 | -    | - | U-Pb ID-TIMS   | Bettencourt et al. (1999) |
| TD-151   | -59.300000 | -9.030000  | Zrn | 1797 | 14 | -    | - | U-Pb ICP-MS-LA | Ribeiro & Duarte (2010)   |
| UP-43b   | -60.117990 | -7.021840  | Zrn | 1791 | 10 | -    | - | U-Pb LA-IC     | Almeida & Reis (2014)     |
| VP-24    | -57.175900 | -5.551400  | Zrn | 1883 | 4  | -    | - | U-Pb SHRIMP    | Santos et al. (2002)      |
| WA-045   | -58.772200 | -10.914700 | Zrn | 1564 | 12 | -    | - | U-Pb ID-TIMS   | Souza & Abreu (2007)      |
| WA-151   | -57.742840 | -10.945310 | Zrn | 1780 | 13 | -    | - | U-Pb ID-TIMS   | Souza & Abreu (2007)      |
| WA-227A  | -58.461490 | -10.869140 | Zrn | 1771 | 14 | -    | - | U-Pb ID-TIMS   | Souza & Abreu (2007)      |
| WB-051   | -63.029000 | -9.941000  | Zrn | 1433 | 11 | -    | - | U-Pb ID-TIMS   | Payolla et al. (2002)     |
| WB-071   | -62.907000 | -9.907000  | Zrn | 1433 | 0  | -    | - | U-Pb ID-TIMS   | Payolla et al. (2002)     |
| WB-08    | -59.070000 | -8.970000  | Zrn | 0    | 2  | -    | - | U-Pb ID-TIMS   | Pinho et al. (2003)       |
| WB-124/1 | -63.074000 | -9.773000  | Zrn | 974  | 6  | -    | - | U-Pb ID-TIMS   | Bettencourt et al. (1999) |
| WB-152   | -62.221000 | -9.474000  | Zrn | 1769 | 0  | 1662 | - | U-Pb SHRIMP    | Payolla et al. (2002a)    |
| WB-223A  | -63.120000 | -9.952000  | Zrn | 1424 | 10 | -    | - | U-Pb ID-TIMS   | Payolla et al. (2002)     |
| WB-36    | -62.252000 | -9.684000  | Zrn | 1532 | 0  | -    | - | U-Pb ID-TIMS   | Payolla et al. (2002)     |
| WB-44A   | -63.068000 | -9.611000  | Zrn | 1526 | 12 | -    | - | U-Pb ID-TIMS   | Payolla et al. (2002)     |
| WB-46A/C | -63.037000 | -9.973000  | Zrn | 1560 | 0  | -    | - | U-Pb ID-TIMS   | Payolla et al. (2002)     |
| WB-51    | -63.028000 | -9.939000  | Zrn | 1433 | 11 | -    | - | U-Pb ID-TIMS   | Payolla et al. (2002)     |
| WB-70    | -63.003000 | -9.936000  | Zrn | 1730 | 22 | -    | - | U-Pb ID-TIMS   | Payolla et al. (2002)     |
| PB-040   | -59.122745 | -6.851540  | Zrn | 1837 | 10 | -    | - | U-Pb ICP-MS-LA | Meloni et al. (2018)      |
| RE-13B   | -59.585767 | -6.733191  | Zrn | 1746 | 8  | -    | - | U-Pb ICP-MS-LA | Meloni et al. (2018)      |
| RE-14    | -59.541100 | -6.687800  | Zrn | 1855 | 6  | -    | - | U-Pb ICP-MS-LA | Meloni et al. (2018)      |
| SS-64    | -59.656501 | -7.004360  | Zrn | 1758 | 12 | -    | - | U-Pb ICP-MS-LA | Meloni et al. (2018)      |
