# Supplementary material
Source: MDPI journal article supplement (https://www.mdpi.com/2075-163X/13/1/78)
Supplement: s1 [file s1]

**Table S2: Statistical summary of some elements considered relevant for Au deposits.**

| <b>Element<br/>(ppm)</b> | <b>Lower detection<br/>limit (LDL)</b> | <b>Above<br/>LDL (%)</b> | <b>Mín.</b> | <b>1st<br/>quartile</b> | <b>3rd<br/>quartile</b> | <b>3rd order<br/>threshold</b> | <b>2nd order<br/>threshold</b> | <b>1st order<br/>threshold</b> | <b>Máy.</b> |
|--------------------------|----------------------------------------|--------------------------|-------------|-------------------------|-------------------------|--------------------------------|--------------------------------|--------------------------------|-------------|
| <b>Ag</b>                | 0.01                                   | 11.96                    | <0,01       | <0,01                   | <0,01                   | <0,01                          | -                              | -                              | 1.29        |
| <b>As</b>                | 1                                      | 18.56                    | <1          | <1                      | <1                      | <1                             | -                              | -                              | 28          |
| <b>Bi</b>                | 0.02                                   | 70.72                    | <0,02       | <0,02                   | 0.07                    | 1.25                           | -                              | -                              | 1.25        |
| <b>Cd</b>                | 0.01                                   | 54.64                    | <0,01       | <0,01                   | 0.02                    | 0.15                           | -                              | -                              | 0.39        |
| <b>Ce</b>                | 0.05                                   | 100                      | 0.7         | 2.76                    | 8.76                    | 46.21                          | -                              | -                              | 98.2        |
| <b>Cu</b>                | 0.5                                    | 99.79                    | <0,5        | 2                       | 5.7                     | 25.2                           | -                              | -                              | 35.1        |
| <b>Hf</b>                | 0.05                                   | 90.52                    | <0,05       | 0.12                    | 0.61                    | 5.64                           | -                              | -                              | 32.7        |
| <b>Hg</b>                | 0.01                                   | 58.97                    | <0,01       | <0,01                   | 0.03                    | 0.2                            | -                              | -                              | 0.2         |
| <b>In</b>                | 0.02                                   | 28.87                    | <0,02       | <0,02                   | 0.02                    | 0.05                           | 0.1                            | -                              | 0.17        |
| <b>La</b>                | 0.1                                    | 100                      | 0.3         | 1.3                     | 4.1                     | 22.5                           | -                              | -                              | 45.7        |
| <b>Mo</b>                | 0.05                                   | 98.56                    | <0,05       | 0.18                    | 0.38                    | 1.16                           | 3.51                           | -                              | 4.08        |
| <b>Sb</b>                | 0.05                                   | 100                      | 0.11        | 0.19                    | 0.29                    | 0.52                           | 1.03                           | 1.26                           | 3.99        |
| <b>Sn</b>                | 0.3                                    | 100                      | 0.4         | 0.8                     | 1.5                     | 3.8                            | 9.8                            | 10.1                           | 57.2        |
| <b>Th</b>                | 0.1                                    | 100                      | 0.2         | 0.7                     | 2.2                     | 11.6                           | -                              | -                              | 27.8        |
| <b>W</b>                 | 0.1                                    | 35.05                    | <0,1        | <0,1                    | 0.1                     | 0.2                            | 0.7                            | 1.6                            | 42.7        |
| <b>Y</b>                 | 0.05                                   | 100                      | 0.21        | 0.97                    | 2.69                    | 10.74                          | -                              | -                              | 37.8        |
